# Supplementary material
Source: publisher figshare collection journal article supplement (https://acs.figshare.com/ndownloader/files/6488808)
Supplement: Supplementary file 1 [file 6488808]

## Supporting Information

# 3D Porous Graphene Aerogel Cathode with High Sulfur Loading and Embedded TiO<sub>2</sub> Nanoparticles for Advanced Lithium-Sulfur Batteries

*Jian-Qiu Huang, Zhenyu Wang, Zheng-Long Xu, Woon Gie Chong,  
Xianying Qin, Xiangyu Wang and Jang-Kyo Kim\**

Department of Mechanical and Aerospace Engineering, The Hong Kong University of  
Science and Technology, Clear Water Bay, Kowloon, Hong Kong, PR China.

### **Corresponding Author**

E-mail address: mejkkin@ust.hk (J.-K. Kim). Tel: +852 2358 7207, Fax: +852 2358  
1543.

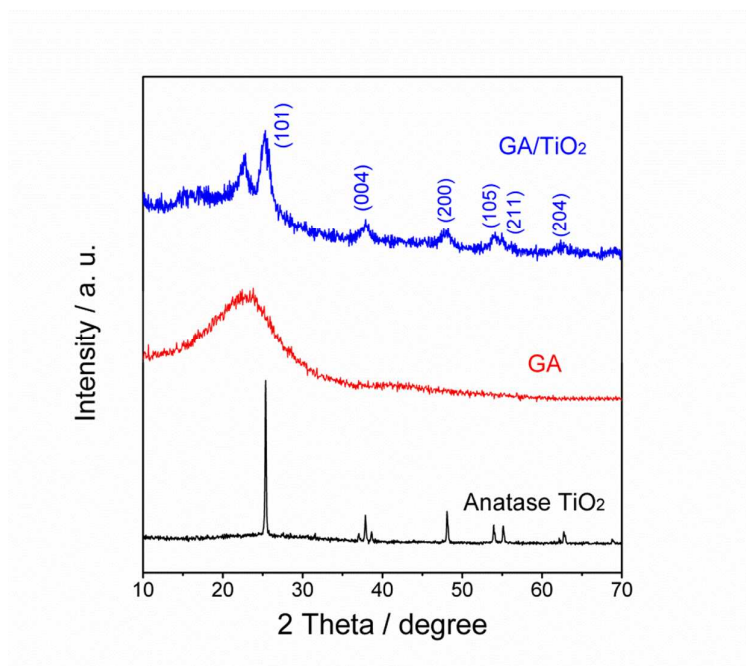

**Figure S1.** XRD patterns of neat TiO<sub>2</sub>, neat GA and GA/TiO<sub>2</sub> composite.

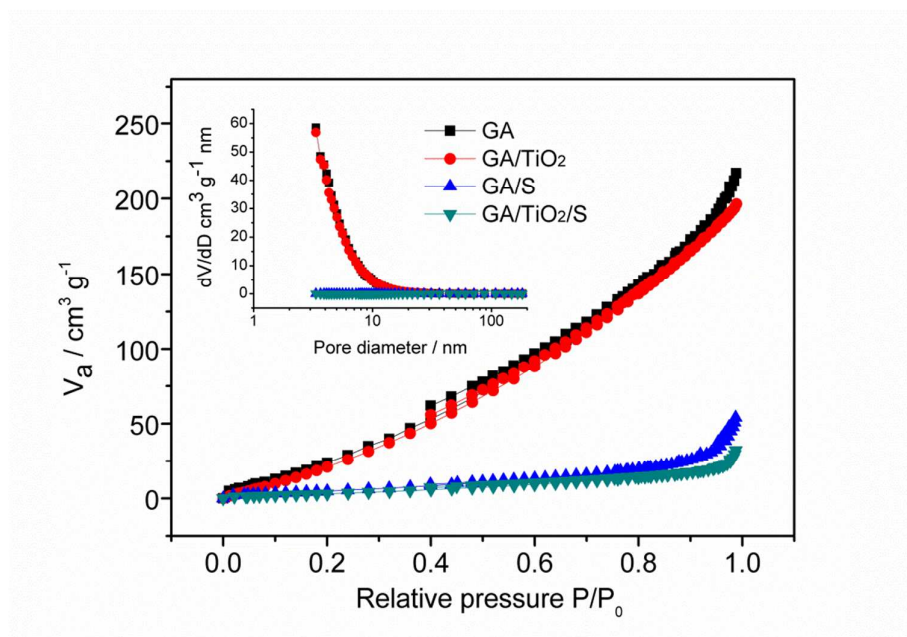

**Figure S2.** Nitrogen adsorption/desorption isotherm curves and pore size distributions of neat GA, GA/TiO<sub>2</sub>, GA/S and GA/TiO<sub>2</sub>/S composites.

**Table S1** Surface areas and pore volumes of neat GA, GA/TiO<sub>2</sub>, GA/S and GA/TiO<sub>2</sub>/S composites

| Materials              | Surface area (m <sup>2</sup> /g) | Pore volume (cm <sup>3</sup> /g) |
|------------------------|----------------------------------|----------------------------------|
| GA                     | 219.5                            | 0.3249                           |
| GA/TiO <sub>2</sub>    | 129.5                            | 0.2973                           |
| GA/S                   | 20.1                             | 0.0736                           |
| GA/TiO <sub>2</sub> /S | 14.1                             | 0.0418                           |

As shown in Figure S2 and Table S1, GA presented a large surface area of 219.5 m<sup>2</sup>/g and a large pore volume of 0.3249 cm<sup>3</sup>/g. With TiO<sub>2</sub> nanoparticles grown on the graphene layers, the GA/TiO<sub>2</sub> composite maintained a highly porous structure in spite of the reduced surface area and pore volume. After the incorporation of sulfur into GA and GA/TiO<sub>2</sub>, the specific surface areas for the GA/S and GA/TiO<sub>2</sub>/S composites dramatically decreased to 20.1 and 14.1 m<sup>2</sup>/g, respectively, indicating the sulfur particles occupying the most of micro- and mesopores.

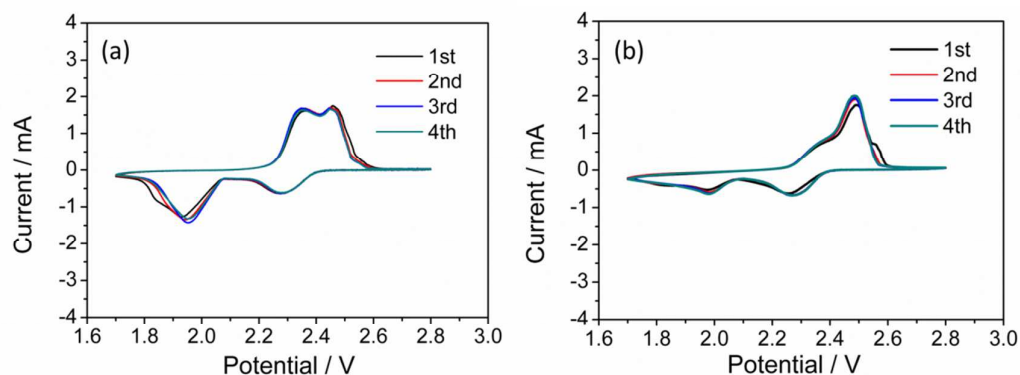

**Figure S3.** Cyclic voltammetric profiles of (a) GA/S composite electrode and (b) pure sulfur electrode at a scan rate of 0.1 mV/s.

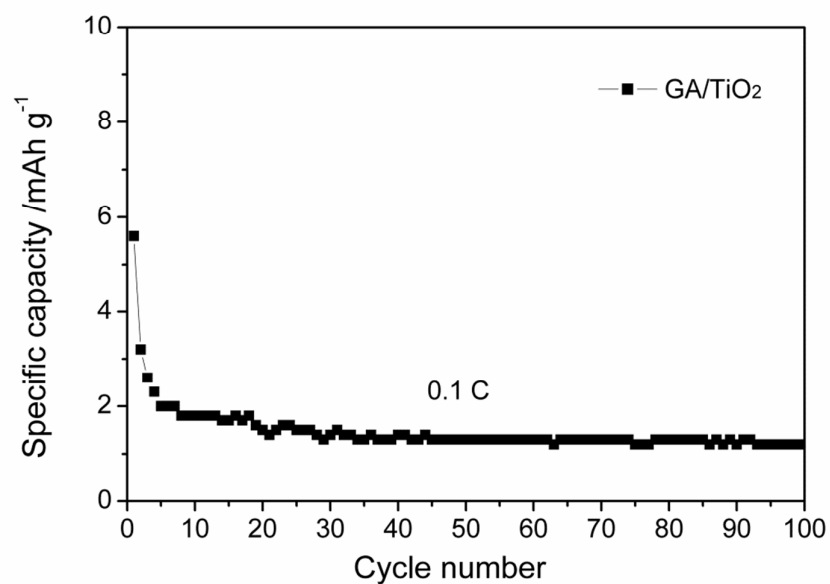

**Figure S4.** Cyclic performance of GA/TiO<sub>2</sub> composite electrode without sulfur.

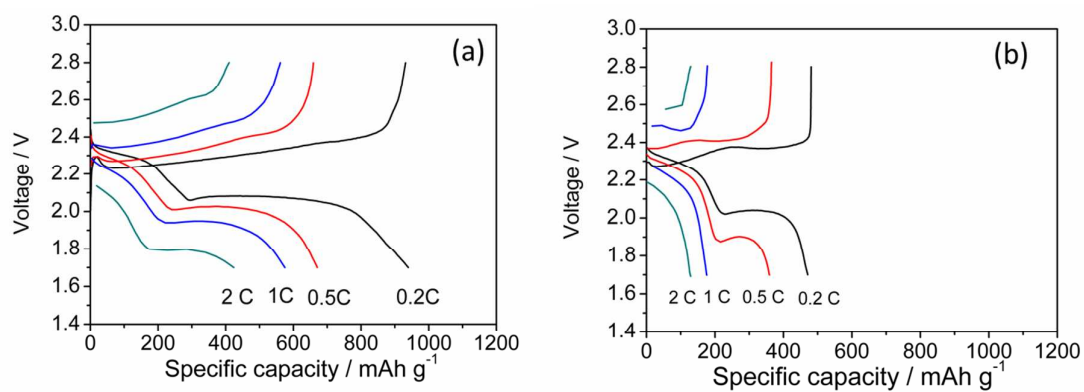

**Figure S5.** Charge/discharge voltage profiles of (a) GA/S electrode and (b) pure sulfur electrode determined at different current rates.

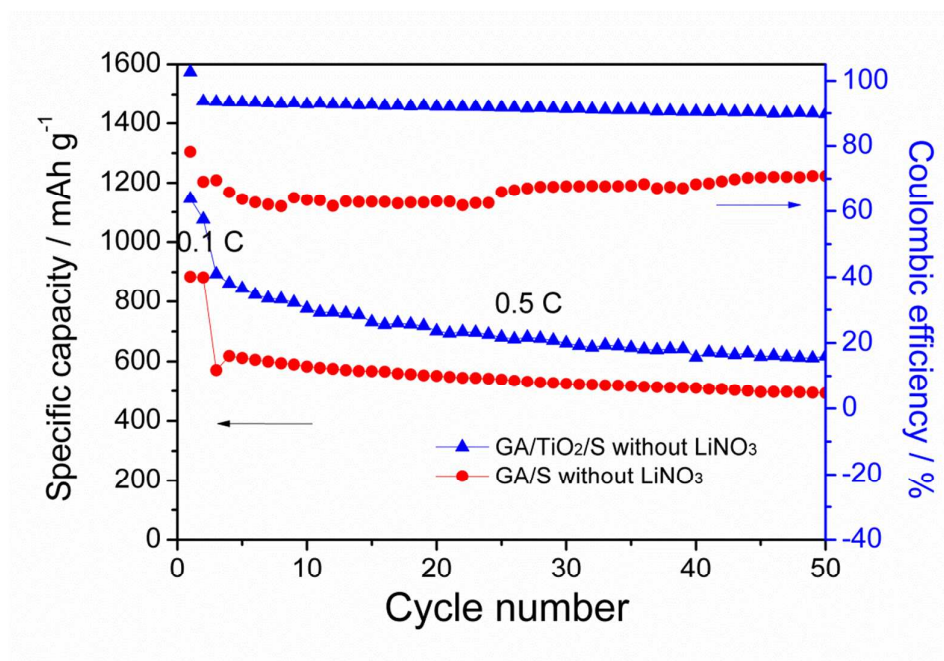

**Figure S6.** Cyclic performance of GA/TiO<sub>2</sub>/S and GA/S electrodes using the electrolyte without LiNO<sub>3</sub>.
